# Supplementary material
Source: PubMed Central journal article supplement (PMC4302165)
Supplement: supp_218.2.212_JEB108597.pdf [file supp_218.2.212_JEB108597.pdf]

## Supplementary Materials

1  
2  
3

Table S1: Summary of headcam video analysis

| Track | Target           | Pursuit duration [s] (% on camera) | $v \pm 95\%$ C.I. [m/s] initial (final) | $a \pm 95\%$ C.I. [g] | Pursuit and evasion details       |
|-------|------------------|------------------------------------|-----------------------------------------|-----------------------|-----------------------------------|
| LR1   | Lure             | 7.37 (10%)                         | $16 \pm 3$ ( $9 \pm 1$ )                | $-1.5 \pm 0.4$        | Perched in tree before            |
| LR2   | Lure             | 6.14 (11%)                         | $8 \pm 2$                               |                       | Perched on a rooftop post before  |
| LR3   | Lure             | 11.85 (5.3%)                       | $7 \pm 1$                               |                       | Perched in tree before            |
| L1    | Falconer's glove | 2.269 (100%)                       | $9 \pm 2$ ( $3 \pm 1$ )                 | $-0.9 \pm 0.2$        | Perched on ground before          |
| L2    | Falconer's glove | 1.268 (100%)                       | $7 \pm 1$                               |                       | Perched on powerline tower before |
| L3    | Falconer's glove | 0.467 (100%)                       | $5 \pm 1$ ( $6 \pm 1$ )                 |                       | In air before                     |
| L4    | Falconer's glove | 2.536 (100%)                       | $13 \pm 5$ ( $5 \pm 4$ )                | $-2.4 \pm 0.8$        | In air before                     |
| L5    | Wooden post      | 0.567 (100%)                       | $12 \pm 2$ ( $5 \pm 1$ )                | $-1.6 \pm 0.3$        | In air before                     |
| L6    | Falconer's       | 3.17 (55%)                         | $11 \pm 2$                              |                       | Perched on post before            |

|     |                          |                |                      |              |                                                                                                           |
|-----|--------------------------|----------------|----------------------|--------------|-----------------------------------------------------------------------------------------------------------|
|     | glove                    |                |                      |              |                                                                                                           |
| L7  | Metal post               | 2.34<br>(100%) | 6 ± 1<br>(2.8 ± 0.5) | -0.12 ± 0.02 | In air before                                                                                             |
| L8  | Falconer's glove         | 2.74 (90%)     | 11 ± 2               |              | Perched on post before flight                                                                             |
| L9  | Falconer's glove         | 0.83<br>(100%) | 9 ± 2                |              | Perched in tree before flight                                                                             |
| L10 | Falconer's glove         | 0.83<br>(100%) |                      |              | In air before landing                                                                                     |
| P1a | Pheasant<br>(stationary) | 8.07 (9.5%)    | 18 ± 4               |              | Swoop from midair; $v_e = 0$ initially; CP: $\theta \approx 0$ deg; prey fled directly                    |
| P1b | pheasant                 | 1.90 (77%)     |                      |              | Shortly after P1a: fly from ground; CATD: $\theta \neq 0$ deg, $\gamma \approx 0$ deg; prey fled directly |
| P2  | pheasant<br>(stationary) | 1.60<br>(100%) | 17 ± 3               |              | Swoop from midair; $v_e = 0$ initially; CP: $\theta \approx 0$ deg; prey escaped sideways                 |
| P3a | pheasant<br>(stationary) | 5.71 (21%)     | 10 ± 3<br>(25 ± 4)   |              | Swoop from tree; $v_e = 0$ initially; CP: $\theta \approx 0$ deg; prey escaped sideways                   |
| P3b | pheasant                 | 0.53           | 5 ± 2                |              | Shortly after P3a: $\theta \neq 0$ and                                                                    |

|     |                                |                |             |  |                                                                                                                                    |
|-----|--------------------------------|----------------|-------------|--|------------------------------------------------------------------------------------------------------------------------------------|
|     |                                | (100%)         |             |  | approx. constant but $\gamma \neq 0$ deg;<br>prey escaped sideways                                                                 |
| P4a | 2<br>pheasants<br>(stationary) | 3.34 (83%)     | $12 \pm 2$  |  | Swoop from tree perch; $v_e = 0$<br>initially; CP: $\theta \approx 0$ deg; one<br>bird escaped sideways, second<br>fled directly   |
| P4b | 2<br>pheasants                 | 1.17<br>(100%) | $13 \pm 10$ |  | Shortly after P4a: flies from<br>ground; $\theta \neq 0$ and approx.<br>constant but $\gamma \neq 0$ deg; prey<br>escaped sideways |
| P5  | pheasant<br>(stationary)       | 7.17 (13%)     |             |  | Swoop from midair; $v_e = 0$<br>initially; CP: $\theta \approx 0$ deg; prey<br>escaped sideways                                    |
| P6  | pheasant                       | 0.57<br>(100%) |             |  | Swoop from midair; initially<br>CPE: $\theta \neq 0$ deg, $\gamma \approx 0$ ; prey<br>escaped sideways                            |
| P7  | pheasant                       | 0.74<br>(100%) | $8 \pm 4$   |  | Swoop from falconer's glove;<br>CPE: $\theta \approx 0$ deg & $\gamma \approx 0$ deg;<br>prey jinked but captured                  |
| R1  | rabbit                         | 2.97 (28%)     | $2 \pm 1$   |  | Swoop from tree; CPE: $\theta \approx 0$<br>deg & $\gamma \approx 0$ deg; prey fled<br>directly                                    |
| R2  | rabbit                         | 5.30 (9.4%)    | $9 \pm 4$   |  | Swoop from tree; CP: $\theta \approx 0$<br>deg, $\gamma \neq 0$ deg; prey escaped                                                  |

|    |        |            |                                |                |                                                                                                                                                                                                |
|----|--------|------------|--------------------------------|----------------|------------------------------------------------------------------------------------------------------------------------------------------------------------------------------------------------|
|    |        |            |                                |                | sideways                                                                                                                                                                                       |
| R3 | rabbit | 4.67 (28%) | $4 \pm 3$<br>( $8.3 \pm 1.7$ ) |                | Swoop from powerline tower; CATD: $\theta \neq 0$ deg, $\gamma \approx 0$ deg as prey jinked, dodged back toward the Goshawk                                                                   |
| R4 | rabbit | 2.74 (86%) | $6 \pm 1$<br>( $4 \pm 1$ )     | $-2.2 \pm 0.8$ | Swoop from tree; CATD: $\theta \neq 0$ deg, $\gamma \approx 0$ deg as prey jinked, then fled directly                                                                                          |
| R5 | rabbit | 2.57 (67%) | $-9 \pm 2$<br>( $7 \pm 3$ )    |                | Swoop from powerline tower; $\theta \approx 0$ deg; prey made two large angle turns, then fled directly; CPE; $\gamma \approx 0$ deg                                                           |
| R6 | rabbit | 8.34 (20%) |                                |                | Swoop from hilltop perch: no visual fixation: initially $\theta$ varies; CPE: $\theta \approx 0$ deg & $\gamma \approx 0$ deg briefly as distant rabbit fled directly before it reached cover. |

4  
5  
6

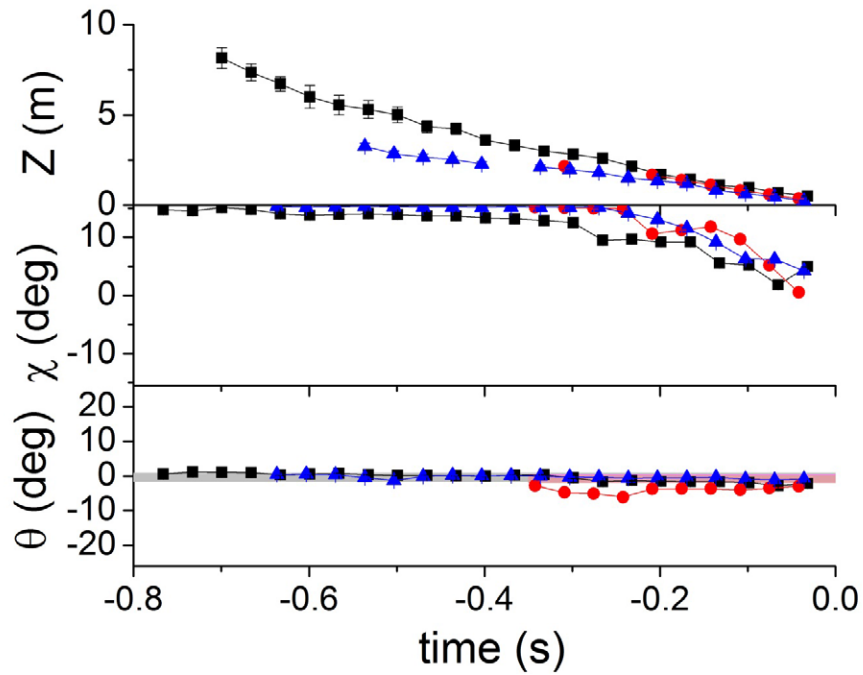

Fig. S1. Data for horizontal and vertical ( $\theta$  and  $\chi$ ) camera angles and  $Z$  (Goshawk-prey) distance vs. time for all three lure datasets. Line and symbol colors and type: LR1 black squares, LR2 red circles, LR3 blue triangles.

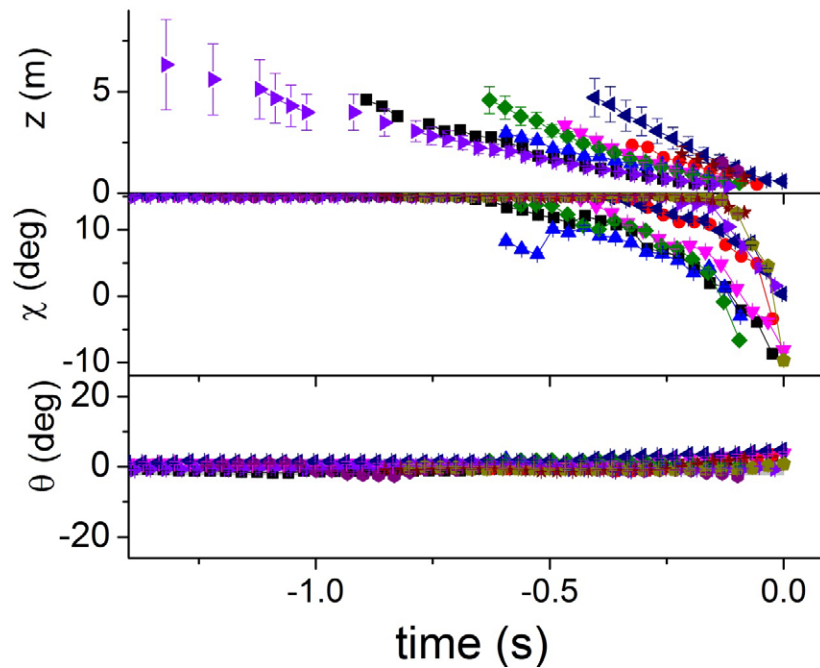

Fig. S2. Data for horizontal and vertical ( $\theta$  and  $\chi$ ) camera angles and  $Z$  (Goshawk-prey) distance vs. time for all ten perch landing flights. Colors of lines and symbols and symbol type: L1 black squares; L2 red circles, L3 blue triangles; L4 magenta inverted triangles, L5 green diamonds, L6 left dark blue triangles, L7 violet right triangles, L8 purple hexagons, L9 dark red stars, and L10 olive pentagons (no  $Z$  data).

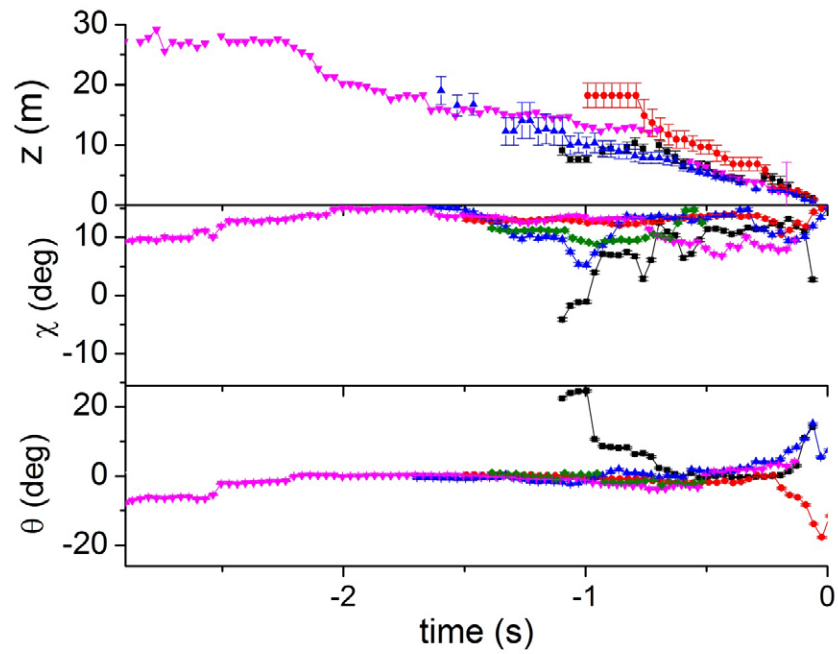

Fig. S3. Data for horizontal and vertical ( $\theta$  and  $\chi$ ) camera angles and  $Z$  (Goshawk-prey distance) vs. time for all five pursuits of primarily stationary pheasants. Deviations from the average  $\theta$  of approximately zero deg close to 0 s were due to the prey beginning to move. Colors of lines and symbols and symbol type: P1a black squares; P2 red circles, P3a blue triangles; P4a magenta inverted triangles, P5 green diamonds (no  $Z$  data).

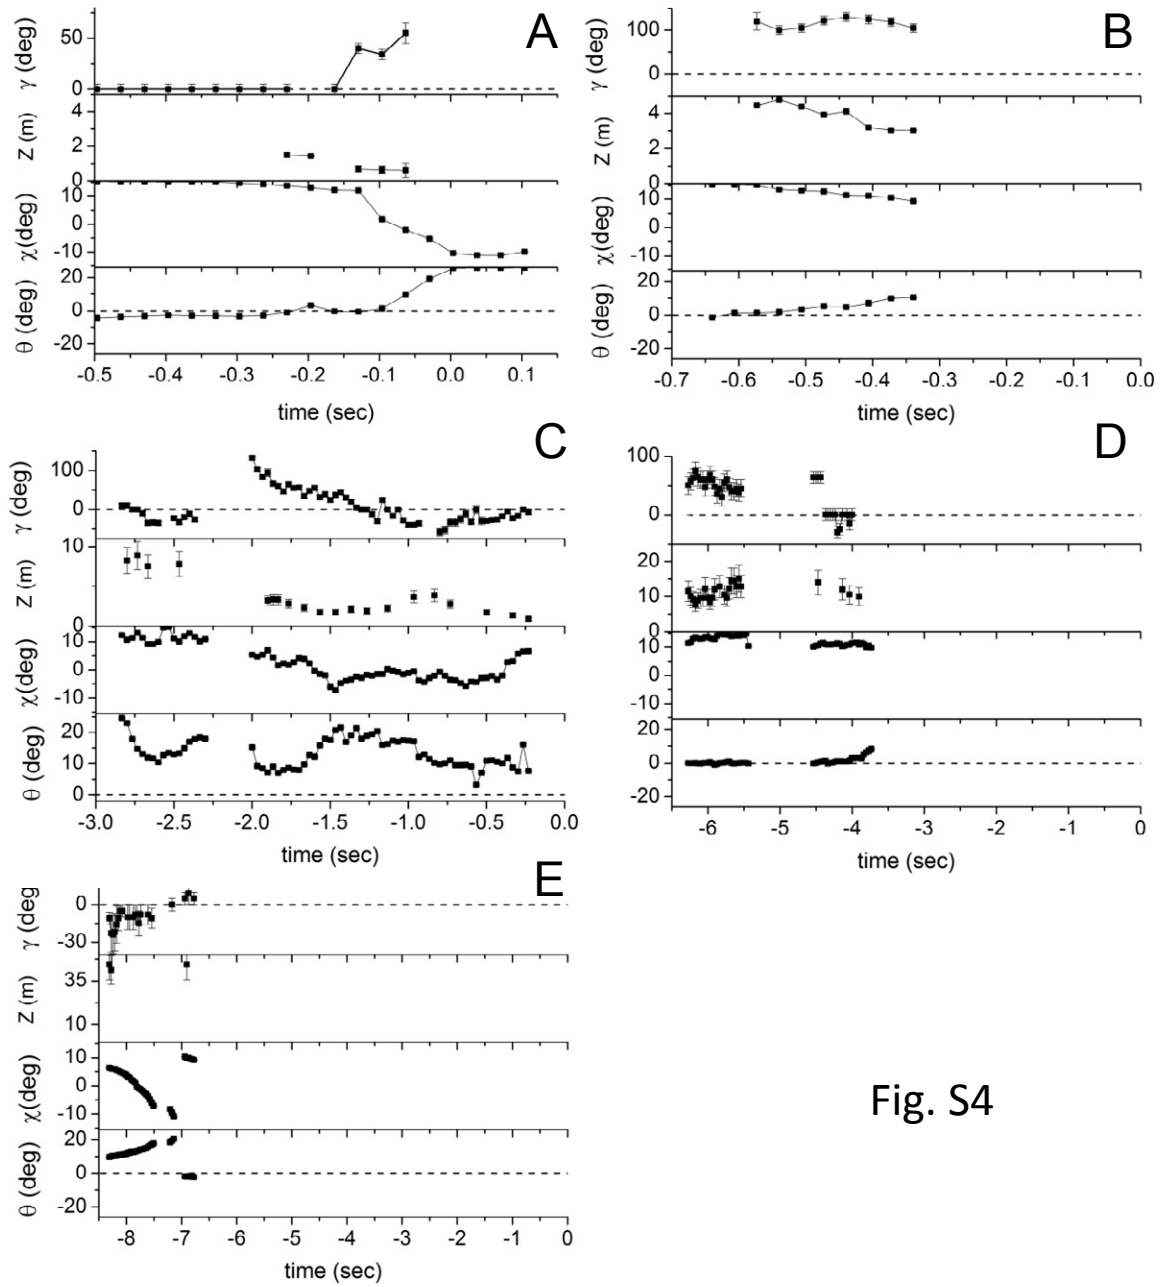

Fig. S4

Fig. S4. Data for horizontal and vertical ( $\theta$  and  $\chi$ ) camera angles,  $Z$  (Goshawk-prey distance) and  $\gamma$  angle vs. time for moving rabbit pursuits (A) R1, (B) R2, (C) R4, (D) R5 and (E) R6.

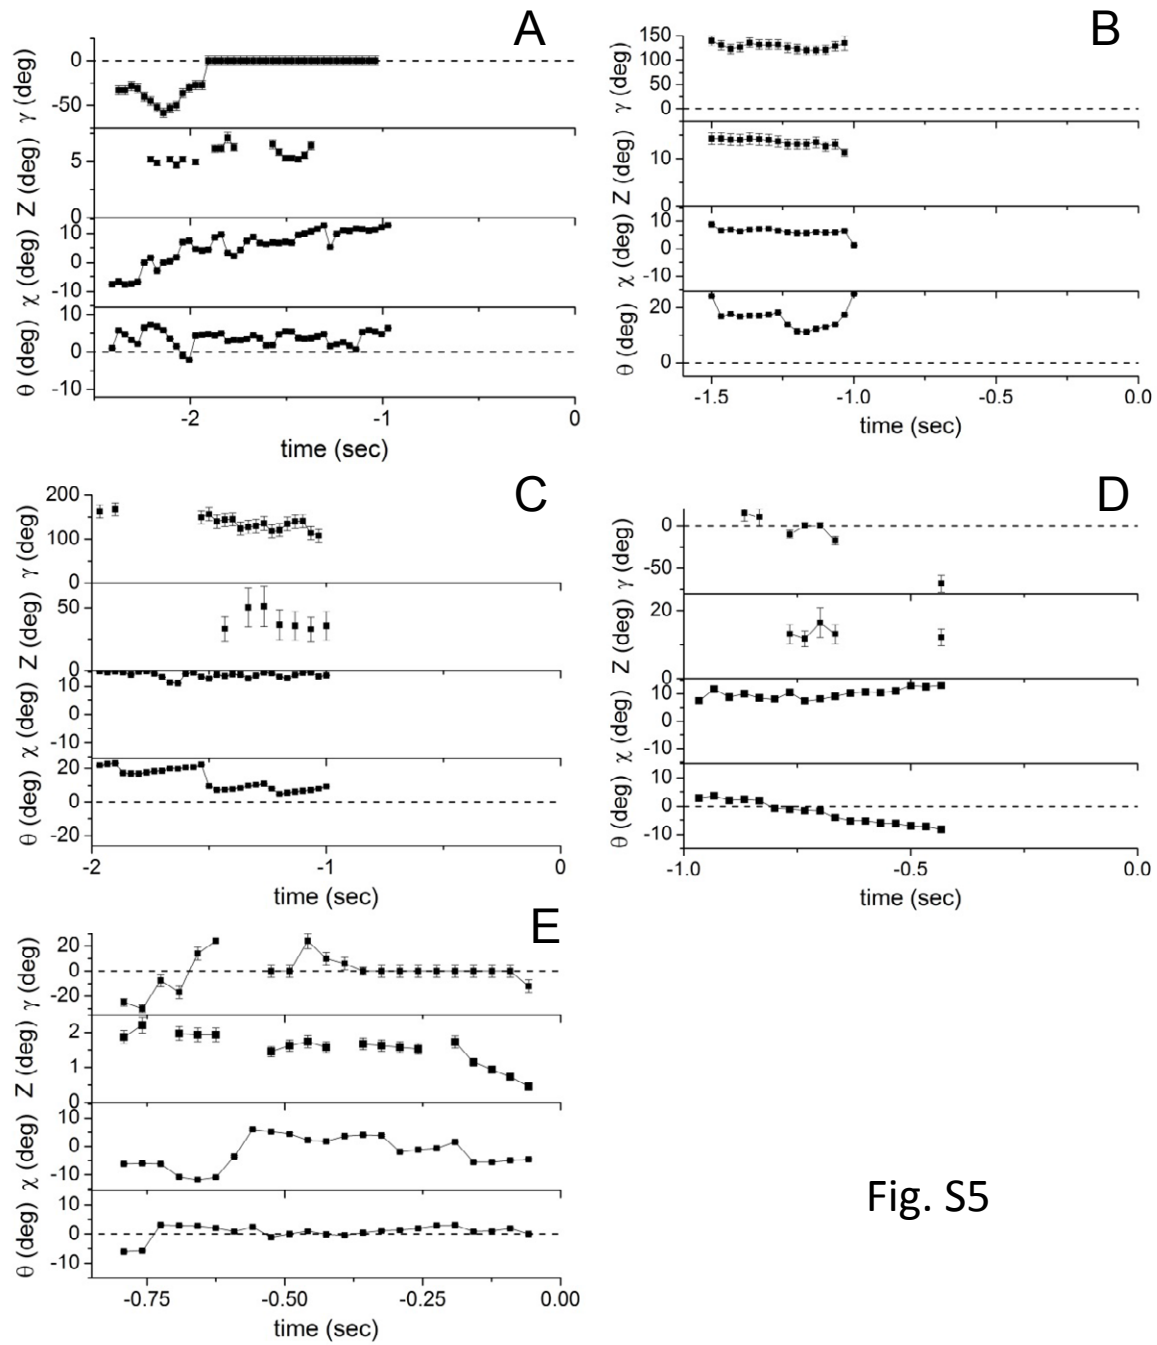

Fig. S5

Fig. S5. Data for horizontal and vertical ( $\theta$  and  $\chi$ ) camera angles, Z (Goshawk-prey distance) and  $\gamma$  angle vs. time for pursuits of moving pheasants: (A) P1b, (B) P3b, (C) P4b, (D) P6 and (E) P7.



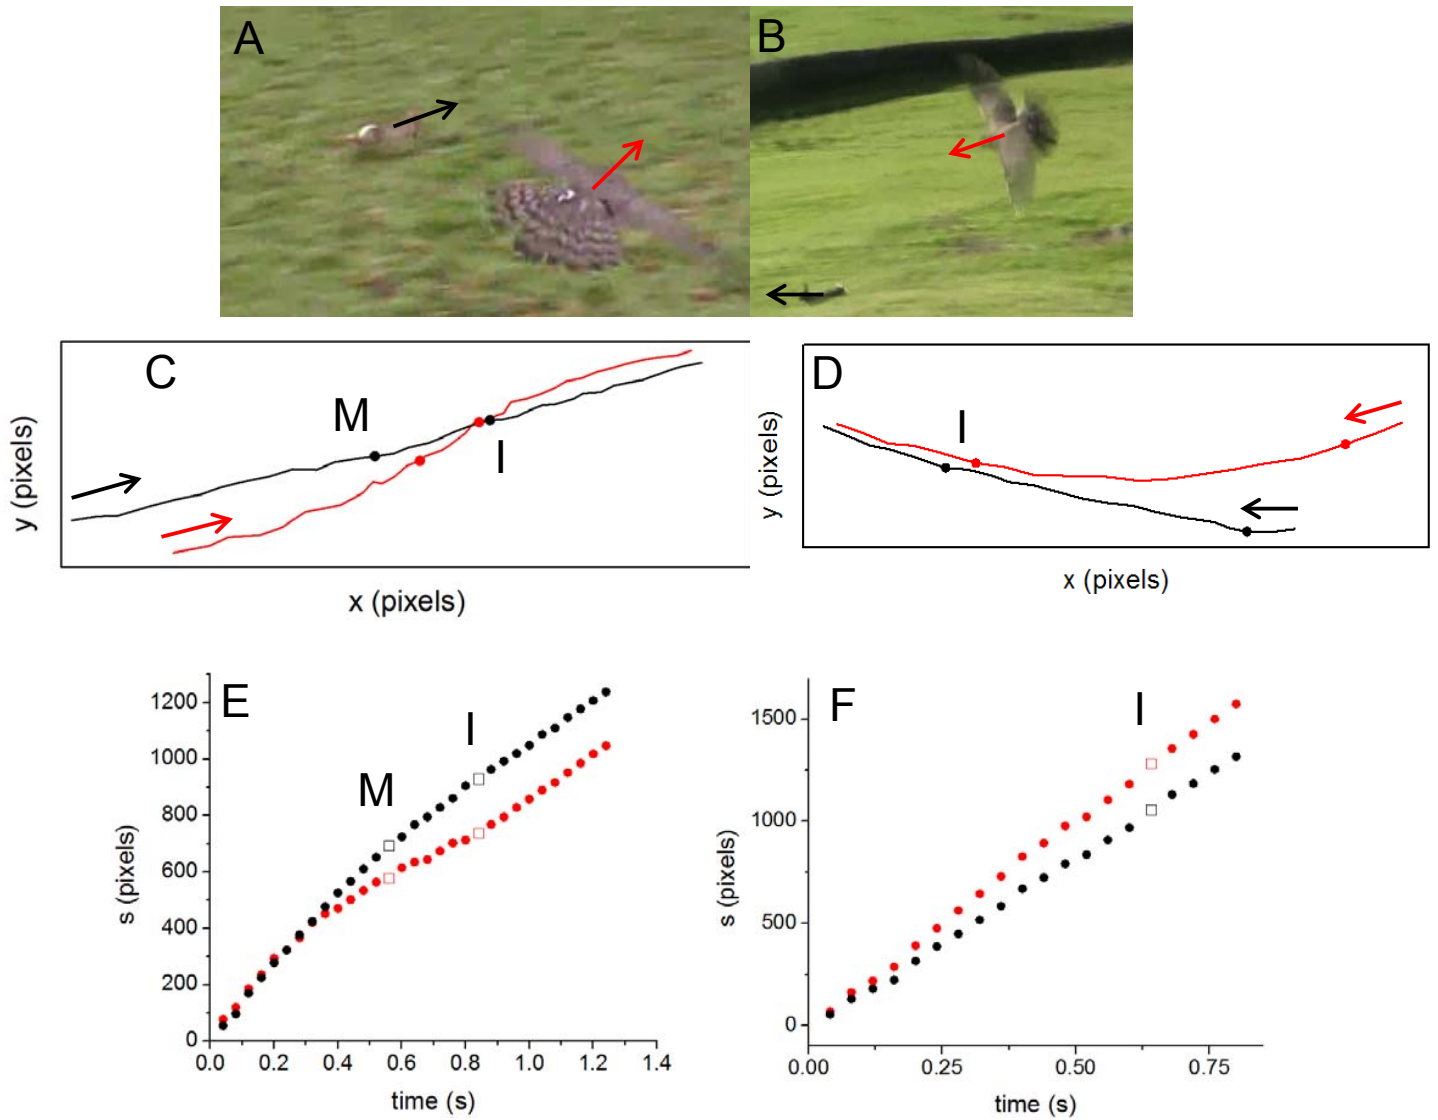

Fig. S6. Still images, tracks on video and plots of  $s$ , arclength along the trajectory, vs. time for two videos filmed from the ground in which the Goshawk used CATD then CPE (A,C,E) or a gradually arcing non-CATD trajectory (B,D,F) to pursue a rabbit. Goshawk data are in red, rabbit data in black. Points labeled M indicates points where at least one of the animals maneuvered and I indicates the point of first interception. Arrows indicate their directions and starting positions. (Image credit: David and Adam Burn)

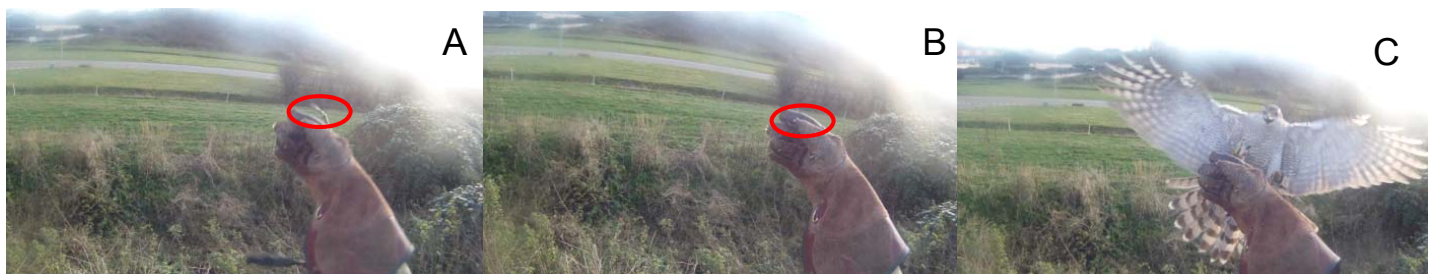

Fig. S7. Still images from a video sequence in which the Goshawk flies to land on the falconer's glove. (A) The Goshawk is visible just above the glove at large distances (red circle) as it turns to fly toward the falconer. (B) It remains concealed by the falconer's glove until immediately before landing (C). (Image credit: Robert Musters)
